# Supplementary material
Source: MDPI journal article supplement (https://www.mdpi.com/2071-1050/16/8/3450)
Supplement: s1 [file s1 › sustainability-2935358-supplementary.pdf]

**Table S1.** Information of the 33 cities included in this study. Population and area are based on the year 2020 from the Statistical Year Book. Cities numbered between 1 to 13 and 14 to 33 are defined as big (population greater than 500,000) and medium (population between 100,000-500,000) cities, respectively.

| No. | Cities     | Location   |           |        | Area (km <sup>2</sup> ) | Population |
|-----|------------|------------|-----------|--------|-------------------------|------------|
|     |            | Longitude  | Latitude  | other  |                         |            |
| 1   | Incheon    | 126° 37' E | 37° 28' N | Coast  | 1,065.23                | 2,948,375  |
| 2   | Seoul      | 127° 11' E | 37° 41' N | Inland | 605.23                  | 9,509,458  |
| 3   | Daejeon    | 127° 33' E | 36° 30' N | Inland | 539.50                  | 1,452,251  |
| 4   | Busan      | 129° 18' E | 35° 23' N | Coast  | 769.89                  | 3,350,380  |
| 5   | Gwangju    | 127° 00' E | 35° 15' N | Inland | 501.13                  | 1,441,611  |
| 6   | Daegu      | 127° 00' E | 35° 15' N | Inland | 883.51                  | 2,385,412  |
| 7   | Suwon      | 127° 05' E | 37° 20' N | Inland | 121.09                  | 1,183,714  |
| 8   | Ulsan      | 129° 27' E | 35° 43' N | Coast  | 1,061.54                | 1,121,592  |
| 9   | Changwon   | 128° 50' E | 35° 23' N | Coast  | 748.81                  | 1,032,741  |
| 10  | Cheongju   | 127° 46' E | 36° 46' N | Inland | 940.30                  | 848,482    |
| 11  | Jeonju     | 127° 14' E | 35° 53' N | Inland | 206.22                  | 657,269    |
| 12  | Cheonan    | 127° 25' E | 36° 57' N | Inland | 636.13                  | 658,486    |
| 13  | Pohang     | 129° 35' E | 36° 20' N | Coast  | 1,128.76                | 503,852    |
| 14  | Icheon     | 127° 43' E | 37° 27' N | Inland | 461.47                  | 223,177    |
| 15  | Yangpyeong | 127° 49' E | 37° 49' N | Inland | 877.79                  | 121,230    |
| 16  | Chuncheon  | 127° 73' E | 37° 88' N | Inland | 1,116.42                | 284,594    |
| 17  | Wonju      | 127° 92' E | 37° 34' N | Inland | 868.25                  | 357,757    |
| 18  | Gangneung  | 128° 88' E | 37° 75' N | Coast  | 104.07                  | 212,965    |
| 19  | Chungju    | 127° 93' E | 36° 99' N | Inland | 983.62                  | 209,358    |
| 20  | Jecheon    | 128° 19' E | 37° 13' N | Inland | 882.77                  | 131,591    |
| 21  | Gunsan     | 126° 74' E | 35° 97' N | Coast  | 397.45                  | 265,304    |
| 22  | Jeongeup   | 126° 86' E | 35° 57' N | Inland | 693.10                  | 106,487    |
| 23  | Mokpo      | 126° 39' E | 34° 81' N | Coast  | 51.66                   | 218,589    |
| 24  | Yeosu      | 127° 66' E | 34° 76' N | Coast  | 512.26                  | 276,762    |
| 25  | Suncheon   | 127° 49' E | 34° 95' N | Coast  | 910.95                  | 281,436    |
| 26  | Andong     | 128° 73' E | 36° 57' N | Inland | 152.22                  | 156,972    |

|    |            |            |           |        |        |         |
|----|------------|------------|-----------|--------|--------|---------|
| 27 | Gumi       | 128° 34' E | 36° 12' N | Inland | 615.31 | 412,581 |
| 28 | Yeongju    | 128° 62' E | 36° 81' N | Inland | 670.11 | 101,942 |
| 29 | Yeongcheon | 128° 94' E | 36° 02' N | Inland | 919.19 | 101,888 |
| 30 | Jinju      | 128° 11' E | 35° 18' N | Inland | 712.90 | 347,097 |
| 31 | Tongyeong  | 128° 43' E | 34° 85' N | Coast  | 240.21 | 125,383 |
| 32 | Milyang    | 128° 79' E | 35° 50' N | Inland | 798.64 | 103,525 |
| 33 | Geoje      | 128° 62' E | 34° 88' N | Coast  | 403.83 | 241,216 |

**Table S2.** CMIP6 GCMs used in this study and their resolutions and developers.

| Model         | Resolution     | Institution                                                                                                                                          |
|---------------|----------------|------------------------------------------------------------------------------------------------------------------------------------------------------|
| ACCESS-ESM1-5 | 1.25°× 1.875°  | Commonwealth Scientific and Industrial Research Organization                                                                                         |
| CanESM5       | 2.81°× 2.81°   | Canadian Centre for Climate Modeling and Analysis                                                                                                    |
| GFDL-ESM4     | 1.3°× 1.0°     | Geophysical Fluid Dynamics Laboratory                                                                                                                |
| CMCC-ESM2     | 0.9°× 1.25°    | Euro-Mediterranean Centre on Climate Change                                                                                                          |
| INM-CM4-8     | 2.0°× 1.5°     | Institute for Numerical Mathematics                                                                                                                  |
| IPSL-CM6A-LR  | 2.5°× 1.27°    | Institute Pierre-Simon Laplace                                                                                                                       |
| MIROC6        | 1.4°× 1.4°     | Japan Agency for Marine-Earth Science and Technology,<br>Atmosphere and Ocean Research Institute and National Institute for<br>Environmental Studies |
| MPI-ESM1-2-LR | 1.875°× 1.86°  | Max Planck Institute for Meteorology(MPI-M)                                                                                                          |
| MRI-ESM2-0    | 1.125°× 1.125° | Meteorological Research Institute                                                                                                                    |
| NorESM2-MM    | 2.5°× 1.89°    | Norwegian Climate Centre                                                                                                                             |

### Equations S1 to S4: VIKOR procedure

The VIKOR method has the following steps:

Step 1: Determination of the best  $f_i^*$  and worst  $f_i^-$  values of all criterion functions,  $i = 1, 2, \dots, n$ . If the  $i$ th function represents a benefit then:

$$f_i^* = \max_j f_{ij}, \quad f_i^- = \min_j f_{ij} \quad (S1)$$

Step 2: Computation of the values  $S_j$  and  $R_j$ ,  $j = 1, 2, \dots, J$ , by the relations

$$S_j = \sum_{i=1}^n \frac{w_i(f_i^* - f_{ij})}{f_i^* - f_i^-}, \quad (S2)$$

$$R_j = \max_i \left[ \frac{w_i(f_i^* - f_{ij})}{f_i^* - f_i^-} \right], \quad (S3)$$

where  $w_i$  are the weights of criteria, expressing their relative importance.

Step 3: Computation of the values  $Q_j$ ,  $j = 1, 2, \dots, J$ , by the relation

$$Q_j = \frac{v(S_j - S^*)}{(S^- - S^*)} + \frac{(1-v)(R_j - R^*)}{(R^- - R^*)} \quad (S4)$$

where  $S^* = \min_j S_j$ ,  $S^- = \max_j S_j$ ,  $R^* = \min_j R_j$ ,  $R^- = \max_j R_j$ , and  $v$  is introduced as weight of the strategy of 'the majority of criteria' (or the maximum group utility), here  $v = 0.5$ .

Step 4: Rank the alternatives, sorting by the values  $S$ ,  $R$ , and  $Q$ , in decreasing order. The results are three ranking lists.

Step 5: Propose as a compromise solution the alternative which is ranked the best by the measure  $Q$  (minimum).

### Equations S5 to S11: TOPSIS procedure

The TOPSIS method has the following steps:

Step 1: Calculation of the normalized decision matrix. The normalized value  $r_{ij}$  is calculated as

$$r_{ij} = \frac{f_{ij}}{\sqrt{\sum_{j=1}^J f_{ij}^2}}, \quad j = 1, 2, \dots, J; i = 1, 2, \dots, n. \quad (S5)$$

Step 2: Calculation of the weighted normalized decision matrix. The weighted normalized value  $v_{ij}$  is calculated as

$$v_{ij} = w_i r_{ij} \quad (S6)$$

where  $w_i$  is the weight of the  $i$ th attribute or criterion, and  $\sum_{i=1}^n w_i = 1$ .

Step 3: Determination of the positive-ideal and negative-ideal solution.

$$A^* = \{v_1^*, \dots, v_n^*\} = \left\{ \left( \max_j v_{ij} \mid i \in I' \right), \left( \min_j v_{ij} \mid i \in I'' \right) \right\} \quad (S7)$$

$$A^- = \{v_1^-, \dots, v_n^-\} = \left\{ \left( \min_j v_{ij} \mid i \in I' \right), \left( \max_j v_{ij} \mid i \in I'' \right) \right\} \quad (S8)$$

where  $I'$  is associated with benefit criteria, and  $I''$  is associated with cost criteria.

Step 4: Calculation of the separation measures, using the  $n$ -dimensional Euclidean distance. The separation of each alternative from the positive-ideal solution is given as

$$D_j^* = \sqrt{\sum_{i=1}^n (v_{ij} - v_i^*)^2} \quad (S9)$$

Similarly, the separation from the negative-ideal solution is given as

$$D_j^- = \sqrt{\sum_{i=1}^n (v_{ij} - v_i^-)^2} \quad (S10)$$

Step 5: Calculation of the relative closeness to the positive-ideal solution. The relative closeness of the alternative  $a_j$  with respect to  $A^*$  is defined as

$$C_j^* = D_j^- / (D_j^* + D_j^-) \quad (S11)$$

Step 6: Rank the preference order.

### Equations S12 to S16: Fuzzy-TOPSIS procedure

As for the fuzziness in the decision data, linguistic variables are used to assess the weights ( $W_{ij}$ ) of all criteria and the normalized performance ratings ( $r_{ij}$ ) of each alternative  $A_i$  with respect to each criterion  $C_j$ . The weighted normalized fuzzy value  $v_{ij}$  is initially calculated as follows:

$$v_{ij} = W_j \times r_{ij} \quad (S12)$$

Then, the weighted normalized matrix  $V = [v_{ij}]_{m \times n}$  is constructed. Next, the fuzzy positive ideal solutions FPISS  $A^+$  and the negative ideal solutions FNISs  $A^-$  are calculated as follows:

$$A^+ = (v_1^+, v_2^+, \dots, v_n^+) \text{ \& } A^- = (v_1^-, v_2^-, \dots, v_n^-) \quad (S13)$$

Where,  $v_j^+ = \max_i v_{ij}$  and  $v_j^- = \min_i v_{ij}$ . The distance between two TFNs  $\tilde{m} = (m_1, m_2, m_3)$  and  $\tilde{n} = (n_1, n_2, n_3)$  can be calculated by means of Eq. (S14). Here, the FPISS (or FNISs) for each indicator is the maximum (or minimum) of weighted normalized values regardless of benefit and cost criteria, as they are considered in the normalization process. Then, the Euclidean distances of each alternative from FPISS and FNISs and the relative closeness  $RC_i$  of each alternative with respect to FPISS are calculated as follows

$$d(\tilde{m}, \tilde{n}) = \sqrt{\frac{1}{3}[(m_1 - n_1)^2 + (m_2 - n_2)^2 + (m_3 - n_3)^2]} \quad (S14)$$

$$d_i^+ = \sqrt{\sum_{j=1}^n (v_{ij} - v_j^+)^2} \text{ \& } d_i^- = \sqrt{\sum_{j=1}^n (v_{ij} - v_j^-)^2} \quad (S15)$$

$$RC_i = \frac{d_i^-}{d_i^+ + d_i^-} \quad (S16)$$

where,  $RC_i$  ranges from 0 to 1. The larger the value, the better the performance of the alternative.

### Equations S17 to S22: Grey-TOPSIS procedure

The procedure of applying the grey-TOPSIS method consists of the following steps:

Determining the decision criteria, the set of most important attributes and describing the alternatives.

Determining the decision matrix  $D$ ,  $x_{ij}$  denotes the grey evaluations of the  $i_{th}$  alternative with respect to the  $j_{th}$  attribute by the decision-maker.

Constructing the normalized grey decision matrices:

$$r_{ij} = \frac{\otimes x_{ij}}{\max_i(\bar{r}_{ij})} = \left( \frac{\underline{x}_{ij}}{\max_i(\bar{x}_{ij})}; \frac{\bar{x}_{ij}}{\max_i(\bar{x}_{ij})} \right) \quad (S17)$$

$$r_{ij} = 1 - \frac{\otimes x_{ij}}{\max_i(\bar{x}_{ij})} = \left( 1 - \frac{x_{ij}}{\max_i(\bar{x}_{ij})}; 1 - \frac{\underline{x}_{ij}}{\max_i(\bar{x}_{ij})} \right) \quad (S18)$$

where,  $\underline{x}_{ij}$  and  $\bar{x}_{ij}$  represent the lower and higher values of the interval.

Determining the positive and negative ideal alternatives. The positive ideal alternative  $A^+$ , and the negative ideal alternative  $A^-$  are shown in Eq.(S19).

$$A^+ = (v_1^+, v_2^+, \dots, v_n^+) \text{ \& } A^- = (v_1^-, v_2^-, \dots, v_n^-) \quad (S19)$$

Where,  $v_j^+ = \max_i v_{ij}$  and  $v_j^- = \min_i v_{ij}$

Calculating the separation measure of the positive and negative ideal alternatives,  $d_i^+$  and  $d_i^-$  using Eqs. (S20) and (S21). In the equations  $w_i$  represents the weight of each criterion.

$$d_i^+ = \sqrt{\frac{1}{2} \sum_{j=1}^m w_i [ |r_j^+ - r_{ij}|^2 + |r_j^+ - \bar{r}_{ij}|^2 ]} \quad (S20)$$

$$d_i^- = \sqrt{\frac{1}{2} \sum_{j=1}^m w_i [ |r_j^- - r_{ij}|^2 + |r_j^- - \bar{r}_{ij}|^2 ]} \quad (S21)$$

Calculating the relative closeness,  $C_i^+$ , to the positive ideal alternative using Eq. (S22).

$$C_i^+ = \frac{d_i^-}{d_i^+ + d_i^-} \quad (S22)$$

where  $0 \leq C_i^+ \leq 1$ . The larger the index value is, the better the evaluation of alternative will be.
